# Supplementary material
Source: PubMed Central journal article supplement (PMC4107314)
Supplement: NIHMS596903-supplement-1.pdf [file NIHMS596903-supplement-1.pdf]

## EL4, sorted polyclonal

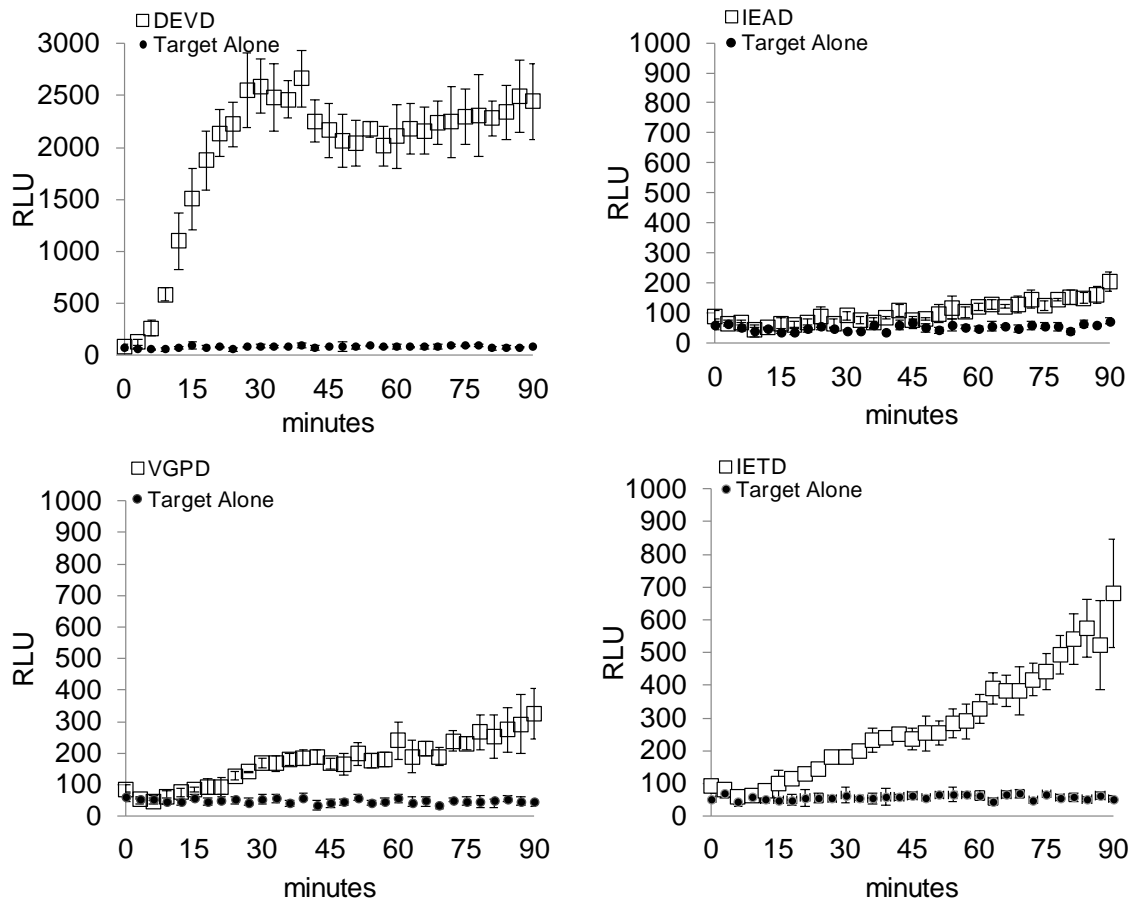

**Supplement Figure 1. EL4 cells expressing biosensors.** All four biosensor constructs were cloned into a retroviral vector (pMIEG) containing a GFP reporter. EL4 cells were infected with retrovirus and GFP (+) cells sorted at the same mean channel fluorescence. This approach allowed evaluation of a polyclonal, stable population expressing the biosensor. Shown is a co-incubation of luciferin substrate-loaded EL4 cells and P14 CTL at an E/T of 6:1. The baseline luminescence from the biosensor luciferase in the target cells without co-incubation with CTL is indicated by target alone.

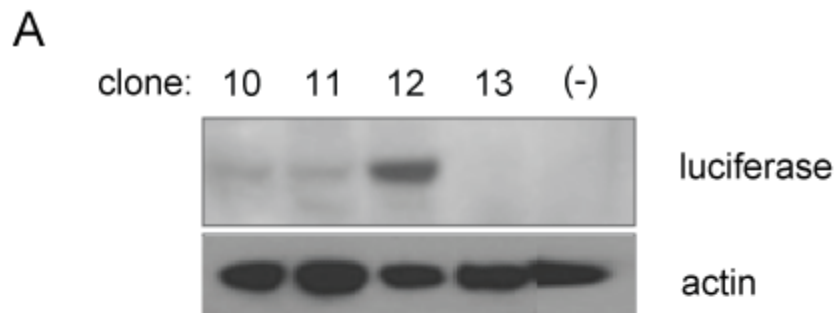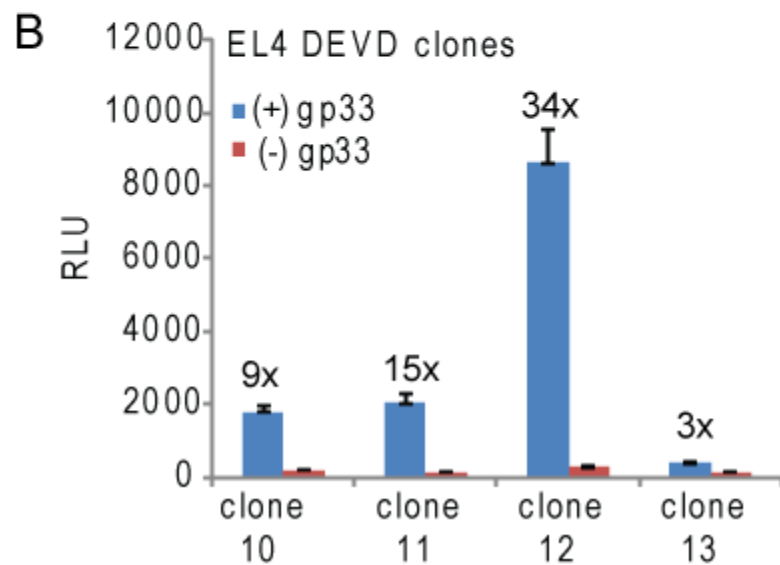

**Supplement Figure 2. EL4 cell clones expressing GLS.DEVD.** (A) Western blot for firefly luciferase in EL4 clones expressing GLS.DEVD. EL4 cells were transfected with the biosensor plasmid and selected by antibiotic resistance. Clones were obtained by limiting dilution; cell lysate was measured for protein expression by western blot with monoclonal anti-firefly luciferase. (B) Induction of GLS.DEVD biosensor by CTL. CTLs were derived by stimulation of splenocytes from TCR transgenic P14 mice with gp33 peptide in vitro. CTLs were co-incubated with substrate-loaded target EL4 clones expressing the GLS.DEVD biosensor at effector/target ratio of 12:1. The target EL4 clones were pulsed with or without gp33 peptide (0.1ug/ml). RLU was measured at 60 minutes. Note that the highest RLU was in clone 12 which expressed the most biosensor protein.

## YAC, sorted polyclonal

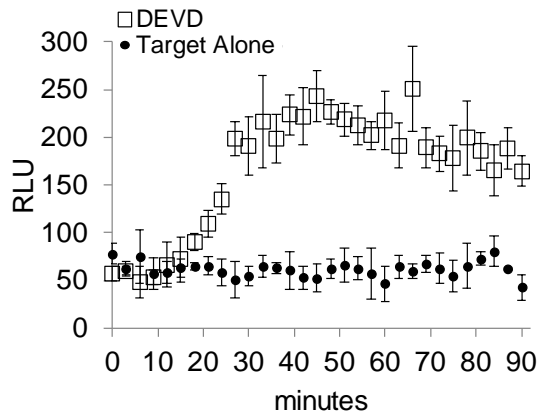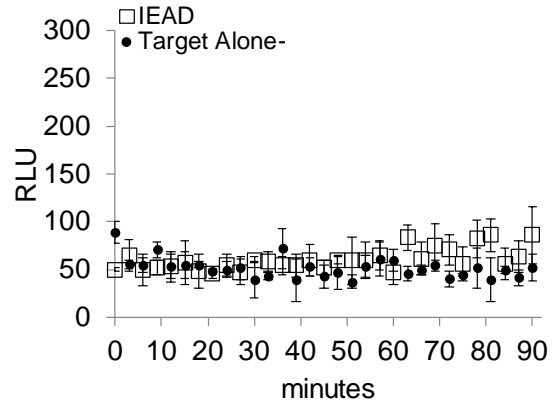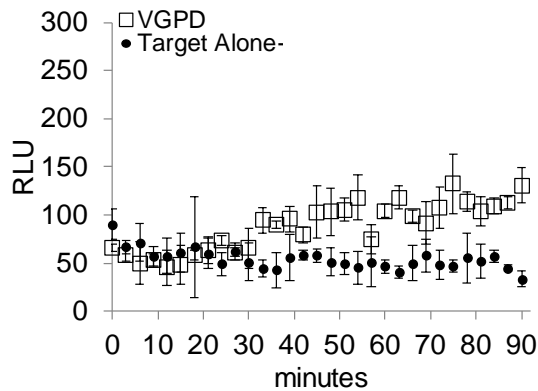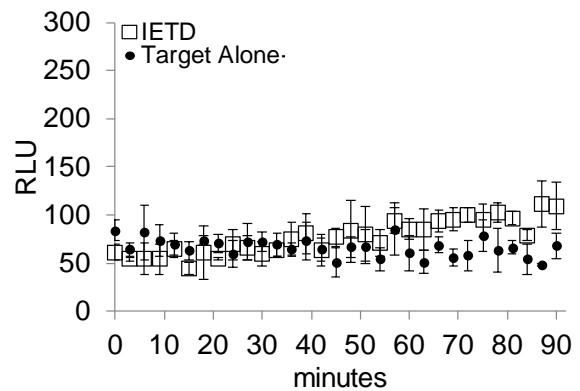

**Supplement Figure 3. YAC cells expressing GLS.DEVD.** YAC cells are a target for murine NK cells. YAC cells were generated to express either biosensor following retroviral transduction and GFP sort as described above. YAC cells expressing biosensors were then co-incubated with IL-2 stimulated, murine NK cells at an E/T of 1:1. Cytokine activated NK were obtained from C57BL/6 mice spleens using magnetic bead selection (NK cell isolation kit II, Miltenyi Biotec) and maintained in 1000U/ml IL2 for 7 days. No signal above target cells alone was detectable for GLS.IEAD.

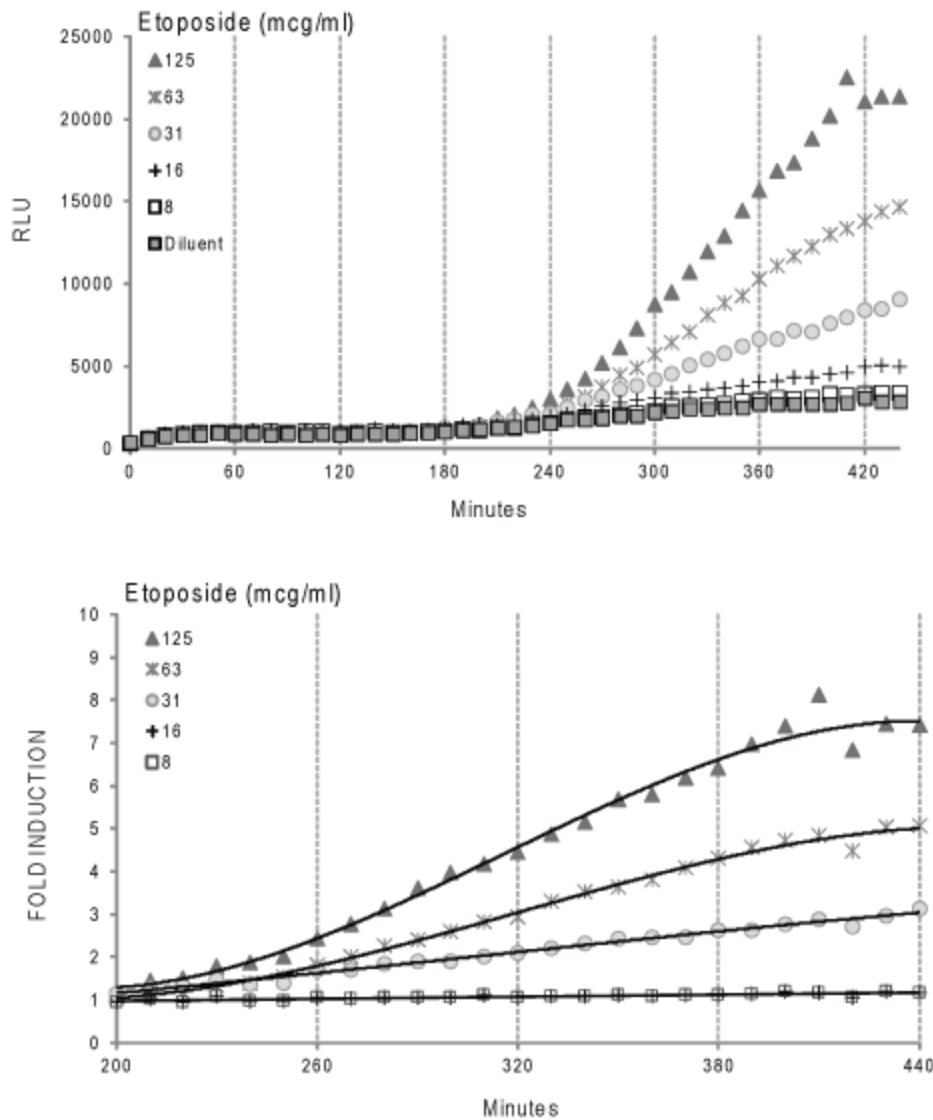

**Supplemental Figure 4. Induction of caspase 3/7 by etoposide.** GLS.DEVD expressing EL4 cells (clone 12) were incubated with titrating concentrations of etoposide in 96 well plates in quadruplicate at 37°C, and luminescence was measured kinetically every 10 minutes up to 440 minutes as shown in the upper graph. The lower graph shows the fold induction over a restricted time point (200-440 minutes) for comparison to CTL induction of the GLS.DEVD as shown in Figure 4.
